# Supplementary material for: Does Methionine Status Influence the Outcome of Selenomethinione Supplementation? A Comparative Study of Metabolic and Selenium Levels in HepG2 Cells
Source: MDPI journal article supplement (doi:10.3390/nu14183705), 2022-09-08
Supplement: s1 [file s1]

**Figure S1.** The relative amounts of viable cells in the 96-well plates that containing different concentrations of Met and SeMet after 48 h incubation.

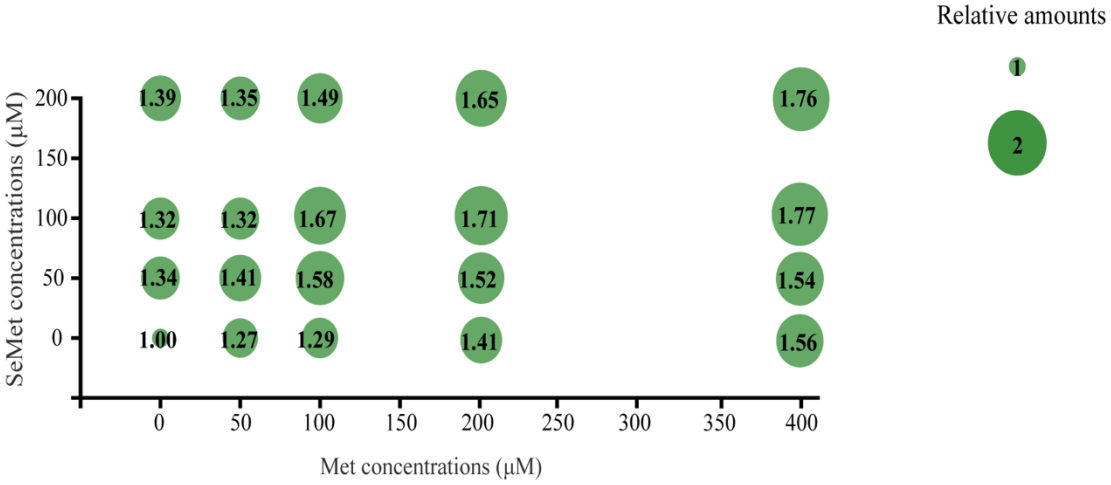

**Figure S2.** 2D NMR spectra of HepG2 cell extracts: (A) An overlap spectrum of  $^1\text{H}$ - $^{13}\text{C}$  HSQC (purple),  $^1\text{H}$ - $^{13}\text{C}$  HMBC (blue) and  $^1\text{H}$  spectroscopy (red); (B) An overlap spectrum of  $^1\text{H}$ - $^1\text{H}$  COSY (purple),  $^1\text{H}$ - $^1\text{H}$  TOCSY (blue) and  $^1\text{H}$  spectroscopy (red).

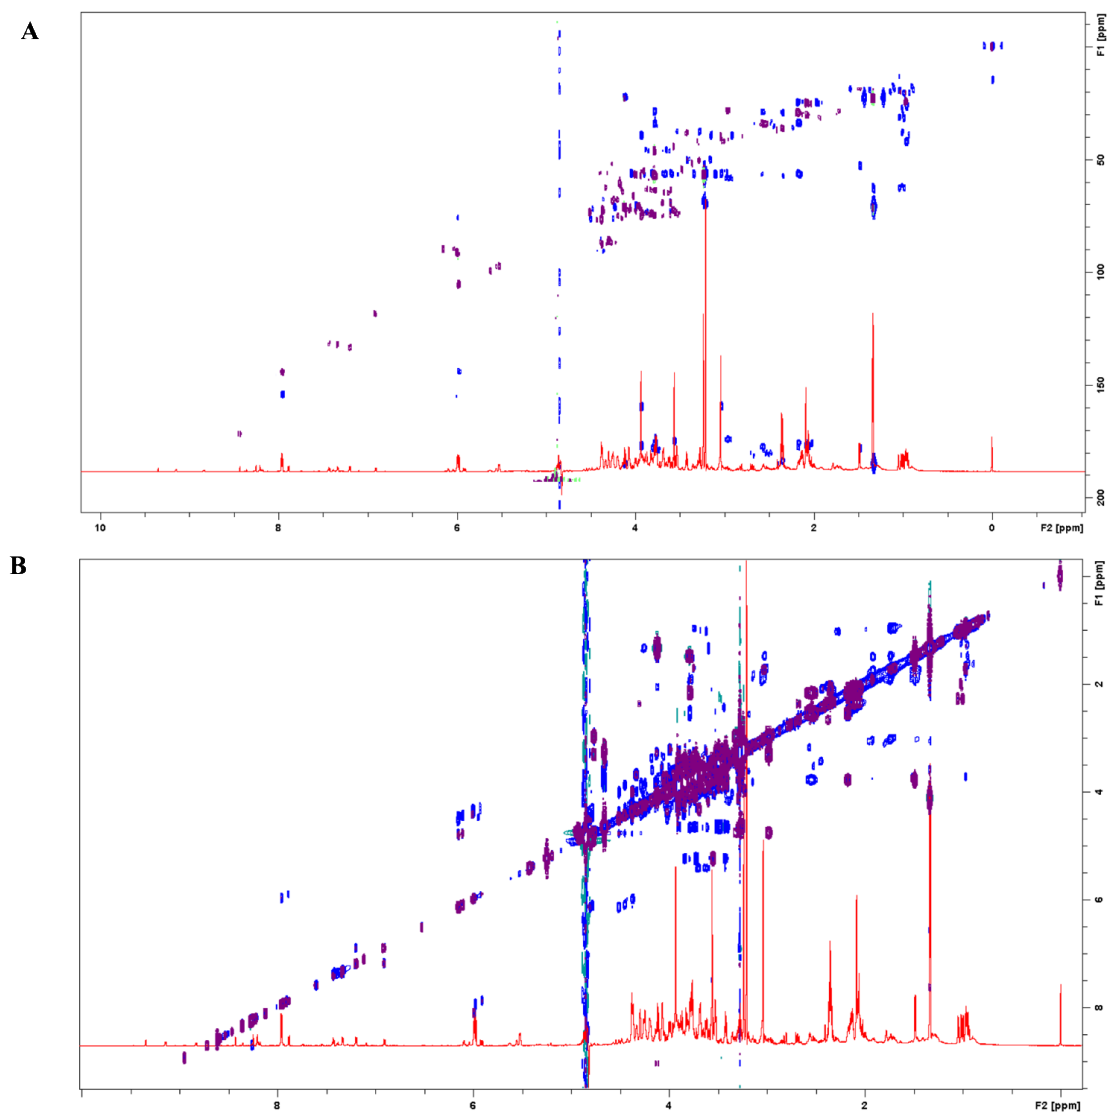

**Table S1.** Primer sequences for RT-qPCR analysis.

| Genes          | Forward primer                    | Reverse primer                |
|----------------|-----------------------------------|-------------------------------|
| <i>GPX1</i>    | 5'- CAGTCGGTGTATGCCTTCTCG-3'      | 5'- GAGGGACGCCACATTCTCG-3'    |
| <i>GPX2</i>    | 5'- GAATGGGCAGAACGAGCATC-3'       | 5'- CCGGCCCTATGAGGAAGTTC-3'   |
| <i>GPX4</i>    | 5'-<br>GAGGCAAGACCGAAGTAAACTAC-3' | 5'- CCGAACTGGTTACACGGGAA-3'   |
| <i>TXNRD1</i>  | 5'- TAGGACAAGCCCTGCAAGACT-3'      | 5'- CCCCAATTCAAAGAGCCAATGT-3' |
| <i>TXNRD2</i>  | 5'- CTAGCCCCGACACTCAGAAGA- 3'     | 5'-GGCCATGATCGCTATGGGT- 3'    |
| <i>SELENOP</i> | 5'- AACTGCTCTCTCACGACTCTC -3'     | 5'- AGCATTTGGTGCTCCTGGTT -3'  |
| <i>GAPDH</i>   | 5'- GGCATCCTGGGCTACACTGA -3'      | 5'- GGAGTGGGTGTCGCTGTTG -3'   |

**Table S2.** NMR data for the metabolites assignment in HepG2 cell extracts.

| No. | Metabolites                       | Group                            | $\delta^1\text{H}$<br>(multiplicity <sup>a</sup> ) | $\delta^{13}\text{C}$ |
|-----|-----------------------------------|----------------------------------|----------------------------------------------------|-----------------------|
| 1   | Acetate                           | CH <sub>3</sub>                  | 1.93(s)                                            | 26.4                  |
|     |                                   | COOH                             | —                                                  | 184.0                 |
| 2   | Alanine (Ala)                     | CH <sub>3</sub>                  | 1.48(d; 7.3)                                       | 18.8                  |
|     |                                   | CH                               | 3.79(m)                                            | 52.9                  |
|     |                                   | COOH                             | b                                                  | 178.5                 |
|     |                                   | CH <sub>2</sub>                  | 2.71(dd; 17.4, 8.7)                                | 39.6                  |
| 3   | Aspartate (Asp)                   | CH <sub>2</sub> '                | 2.81(dd; 17.4, 3.7)                                | 39.6                  |
|     |                                   | CH                               | 3.90(dd; 8.7, 3.7)                                 | 55.1                  |
|     |                                   | COOH                             | b                                                  | 179.0                 |
|     |                                   | (CH <sub>3</sub> ) <sub>3</sub>  | 3.21(s)                                            | 56.7                  |
| 4   | Choline                           | NCH <sub>2</sub>                 | 3.52(m)                                            | 70.1                  |
|     |                                   | CH <sub>2</sub> OH               | 4.07(m)                                            | 57.8                  |
|     |                                   | CH <sub>2</sub>                  | 2.55(d; 15.2)                                      | 48.5                  |
|     |                                   | CH <sub>2</sub> '                | 2.68(d; 15.2)                                      | 48.5                  |
| 5   | Citrate                           | C-OH                             | —                                                  | 78.4                  |
|     |                                   | CH <sub>2</sub> -COOH            | —                                                  | 181.6                 |
|     |                                   | quaternary C-COOH                | —                                                  | 184.7                 |
|     |                                   | CH <sub>3</sub>                  | 3.04(s)                                            | 39.8                  |
| 6   | Creatine                          | CH <sub>2</sub>                  | 3.93(s)                                            | 56.4                  |
|     |                                   | C=NH                             | b                                                  | 159.7                 |
|     |                                   | COOH                             | b                                                  | 177.2                 |
| 7   | Fatty acids and fatty acyl chains | CH <sub>3</sub>                  | 0.88(t; 7.2)                                       | 16.8                  |
|     |                                   | CH <sub>3</sub> -CH <sub>2</sub> | 1.28                                               | 32.6                  |

|    |                             |                                         |                        |                 |
|----|-----------------------------|-----------------------------------------|------------------------|-----------------|
|    |                             | (CH <sub>2</sub> ) <sub>n</sub>         | 1.30                   | 25.7            |
|    |                             | CH <sub>2</sub> -CH <sub>2</sub> -CO    | 1.57                   | 27.6            |
|    |                             | CH <sub>2</sub> -CH <sub>2</sub> -CH=CH | 2.01                   | 30.0            |
|    |                             | CH <sub>2</sub> -CH <sub>2</sub> -CO    | 2.24                   | 36.5            |
|    |                             | CH=CH-CH <sub>2</sub> -CH=CH            | 2.75                   | 28.4            |
|    |                             | CH=CH                                   | 5.30                   | 131.0,<br>131.8 |
| 8  | Formate                     | HCOOH                                   | 8.46(s)                | 172.4           |
| 9  | Fumarate                    | CH                                      | 6.53(s)                | 138.1           |
|    |                             | βCH <sub>2</sub>                        | 2.07(m)                | 30.4            |
|    |                             | βCH <sub>2</sub> '                      | 2.13(m)                | 30.2            |
| 10 | Glutamate (Glu)             | γCH <sub>2</sub>                        | 2.35(m)                | 36.5            |
|    |                             | CH                                      | 3.76(dd; 7.3,<br>4.7)  | 57.7            |
|    |                             | COOH                                    | b                      | 184.3           |
|    |                             | βCH <sub>2</sub>                        | 2.14(m)                | 29.6            |
| 11 | Glutamine (Gln)             | γCH <sub>2</sub>                        | 2.46(m)                | 34.0            |
|    |                             | CH                                      | 3.78(t; 6.2)           | 57.4            |
|    |                             | Glu βCH <sub>2</sub>                    | 2.17(m)                | 29.3            |
|    |                             | Glu γCH <sub>2</sub>                    | 2.52(m)                | 34.8            |
|    |                             | Glu γCH <sub>2</sub> '                  | 2.56(m)                | 34.8            |
| 12 | Glutathione                 | Cys βCH <sub>2</sub>                    | 2.98(dd; 14.2,<br>9.6) | 41.7            |
|    |                             | Cys βCH <sub>2</sub> '                  | 3.31(dd; 14.2,<br>4.4) | 41.7            |
|    |                             | Glu αCH                                 | 3.78(m)                | 56.7            |
|    |                             | Cys αCH                                 | 4.76(dd)               | 56.0            |
|    |                             | Gly αCH <sub>2</sub>                    | b                      | b               |
|    |                             | (CH <sub>3</sub> ) <sub>3</sub>         | 3.24(s)                | 57.0            |
|    |                             | CH <sub>2</sub> -OH                     | 3.68(m)                | 65.1            |
|    |                             | NCH <sub>2</sub>                        | 3.68(m)                | 69.1            |
| 13 | Glycerophosphocholine (GPC) | OCH <sub>2</sub> of glycerol            | 3.88(m)                | 69.6            |
|    |                             | CH-OH                                   | 3.92(m)                | 72.7            |
|    |                             | OCH <sub>2</sub> ' of glycerol          | 3.95(m)                | 69.6            |
|    |                             | NCH <sub>2</sub> CH <sub>2</sub>        | 4.33(m)                | 62.5            |
| 14 | Glycine (Gly)               | CH <sub>2</sub>                         | 3.56(s)                | 44.3            |
|    |                             | COOH                                    | b                      | 178.3           |
| 15 | Histidine (His)             | CH <sub>2</sub>                         | 3.18                   | b               |
|    |                             | CH <sub>2</sub> '                       | 3.26                   | b               |

|    |                             |                          |               |       |
|----|-----------------------------|--------------------------|---------------|-------|
|    |                             | HOOC-CH                  | b             | b     |
|    |                             | C=CH                     | 7.10(s)       | b     |
|    |                             | N=CH                     | 7.90(s)       | b     |
|    |                             | quaternary C             | b             | b     |
|    |                             | C(2)H                    | 8.20(s)       | b     |
|    |                             | C(7)H                    | 8.22(s)       | b     |
| 16 | Hypoxanthine                | C(9)                     | b             | b     |
|    |                             | C-OH                     | b             | b     |
|    |                             | C(5)                     | b             | b     |
|    |                             | $\delta\text{CH}_3$      | 0.94(t; 7.4)  | 14.3  |
|    |                             | $\beta\text{CH-CH}_3$    | 1.01(d; 7.0)  | 17.7  |
| 17 | Isoleucine (Ile)            | $\gamma\text{CH}_2$      | 1.27(m)       | 27.0  |
|    |                             | $\gamma\text{CH}_2'$     | 1.47(m)       | 27.0  |
|    |                             | $\beta\text{CH}$         | 1.98(m)       | 38.9  |
|    |                             | $\alpha\text{CH}$        | 3.68(d; 4.0)  | 63.0  |
|    |                             | COOH                     | b             | 177.0 |
| 18 | Lactate                     | $\text{CH}_3$            | 1.33(d; 6.9)  | 22.8  |
|    |                             | CH                       | 4.11(q; 6.9)  | 71.3  |
|    |                             | COOH                     | b             | 185.2 |
|    |                             | $\delta\text{CH}_3$      | 0.96(d; 6.1)  | 24.4  |
|    |                             | $\delta'\text{CH}_3$     | 0.97(d; 6.1)  | 25.1  |
| 19 | Leucine (Leu)               | $\beta\text{CH}_2$       | 1.70(m)       | 42.4  |
|    |                             | $\gamma\text{CH}$        | 1.72(m)       | 26.5  |
|    |                             | $\beta\text{CH}_2'$      | 1.74(m)       | 42.4  |
|    |                             | $\alpha\text{CH}$        | 3.74(m)       | 56.5  |
|    |                             | COOH                     | b             | 117.6 |
|    |                             | $\gamma\text{CH}_2$      | 1.45(m)       | 24.6  |
|    |                             | $\gamma\text{CH}_2'$     | 1.51(m)       | 24.6  |
|    |                             | $\delta\text{CH}_2$      | 1.72(m)       | 28.5  |
| 20 | Lysine (Lys)                | $\beta\text{CH}_2$       | 1.91(m)       | 32.9  |
|    |                             | $\varepsilon\text{CH}_2$ | 3.03(t; 7.5)  | 41.9  |
|    |                             | CH                       | 3.76          | 57.7  |
|    |                             | COOH                     | b             | 177.5 |
| 21 | Methanol                    | $\text{CH}_3$            | 3.36(s)       | 51.8  |
| 22 | Methylphosphate             | $\text{CH}_3$            | 3.47(d; 10.1) | 54.4  |
|    |                             | $\alpha\text{-C1H}$      | 5.21(d)       | 93.3  |
|    |                             | $\alpha\text{-C2,5,6H}$  | 3.85 (m)      | b     |
| 23 | N-acetylglucosamine(GlcNAc) | $\alpha\text{-C3H}$      | 3.76          | 73.5  |
|    |                             | $\alpha\text{-C4H}$      | 3.46          | 72.7  |
|    |                             | $\beta\text{-C1H}$       | 4.71          | 97.8  |
|    |                             | $\beta\text{-C2H}$       | 3.67          | 59.5  |

|    |                                            |                                 |                        |       |
|----|--------------------------------------------|---------------------------------|------------------------|-------|
|    |                                            | $\beta$ -C3H                    | 3.53                   | 76.7  |
|    |                                            | $\beta$ -C4,5H                  | 3.46                   | 72.7  |
|    |                                            | NA-H                            | 2.05 (s)               | 24.8  |
|    |                                            | 8-CH of adenine                 | 8.18(s)                | b     |
|    |                                            | 5-CH of nicotinamide            | 8.19(m)                | b     |
| 24 | Nicotinamide Adenine<br>Dinucleotide (NAD) | 2-CH of adenine                 | 8.43(s)                | b     |
|    |                                            | 4-CH of nicotinamide            | 8.83(dd)               | b     |
|    |                                            | 6-CH of nicotinamide            | 9.14(m)                | b     |
|    |                                            | 2-CH of nicotinamide            | 9.34(s)                | b     |
|    |                                            | CH <sub>2</sub>                 | 3.13(dd; 14.5,<br>7.8) | 39.5  |
|    |                                            | CH <sub>2</sub> '               | 3.28(dd; 14.5,<br>5.2) | 39.5  |
| 25 | Phenylalanine (Phe)                        | N-CH                            | 4.00(dd)               | 58.8  |
|    |                                            | o-CH                            | 7.33(m)                | 132.0 |
|    |                                            | p-CH                            | 7.38(m)                | 130.9 |
|    |                                            | m-CH                            | 7.43(m)                | 132.1 |
|    |                                            | quaternary C                    | b                      | 138.0 |
|    |                                            | COOH                            | b                      | 175.9 |
|    |                                            | (CH <sub>3</sub> ) <sub>3</sub> | 3.23(s)                | 56.8  |
| 26 | Phosphorylcholine (PC)                     | N-CH <sub>2</sub>               | 3.59(m)                | 69.0  |
|    |                                            | O-CH <sub>2</sub>               | 4.18(m)                | 60.8  |
| 27 | Succinate                                  | CH <sub>2</sub>                 | 2.41(s)                | 36.9  |
|    |                                            | COOH                            | b                      | 185.1 |
| 28 | Taurine                                    | S-CH <sub>2</sub>               | 3.28(t; 6.6)           | 50.4  |
|    |                                            | N-CH <sub>2</sub>               | 3.42(t; 6.6)           | 37.8  |
|    |                                            | CH <sub>2</sub>                 | 3.06(dd; 14.7,<br>7.7) | 38.6  |
|    |                                            | CH <sub>2</sub> '               | 3.19(dd)               | 38.6  |
|    |                                            | N-CH                            | 3.94(dd)               | 59.0  |
| 29 | Threonine (Thr)                            | o-CH to C-OH                    | 6.90(m)                | 118.3 |
|    |                                            | m-CH to C-OH                    | 7.20(m)                | 133.4 |
|    |                                            | quaternary C                    | b                      | 129.6 |
|    |                                            | C-OH                            | b                      | 158.0 |
|    |                                            | COOH                            | b                      | 177.1 |
|    |                                            | C(8)H of indole                 | 7.20(m)                | 122.3 |
|    |                                            | C(9)H of indole                 | 7.29(m)                | 124.9 |
| 30 | Tryptophan (Trp)                           | C(2)H of indole                 | 7.33(s)                | 128.0 |
|    |                                            | C(6)H of indole                 | 7.55(m)                | 115.2 |
|    |                                            | C(7)H of indole                 | 7.74(m)                | 121.3 |
|    |                                            | C(5) of indole                  | —                      | 92.5  |
| 31 | Tyrosine (Tyr)                             | CH <sub>2</sub>                 | 3.06(dd; 14.7,<br>7.7) | 38.6  |

|    |                           |                   |              |           |
|----|---------------------------|-------------------|--------------|-----------|
|    |                           | CH <sub>2</sub> ' | 3.19(dd)     | 38.6      |
|    |                           | N-CH              | 3.94(dd)     | 59.0      |
|    |                           | o-CH to C-OH      | 6.90(m)      | 118.3     |
|    |                           | m-CH to C-OH      | 7.20(m)      | 133.4     |
|    |                           | quaternary C      | b            | 129.6     |
|    |                           | C-OH              | b            | 158.0     |
|    |                           | COOH              | b            | 177.1     |
|    |                           | G1-H              | 5.61         | 99.4      |
|    |                           | C6,ring           | 7.96(d)      | 144.4     |
|    |                           | C5,ring           | 5.98(d)      | 105.4     |
|    |                           | C1'H,ribose       | 5.99(d)      | 91.3      |
|    |                           | C2'3'H,ribose     | 4.38(m)      | 72.2/76.5 |
| 32 | UDP-glucose               | C4',ribose        | 4.29(m)      | 85.9      |
|    |                           | C5'H,ribose       | 4.26/4.21(m) | 67.8      |
|    |                           | G2-H              | 3.9          | 73.1      |
|    |                           | G6-H              | 3.86/3.78    | 63.4      |
|    |                           | G3-H              | 3.77         | 74.7      |
|    |                           | G4-H              | 3.54         | 74.0      |
|    |                           | G5-H              | 3.47         | 72.0      |
|    |                           | G1-H              | 5.63         | 99.4      |
|    |                           | C6,ring           | 7.95(d)      | 144.5     |
|    |                           | C1'H,ribose       | 6.00(d)      | 91.4      |
|    |                           | C5,ring           | 5.974(d)     | 105.3     |
|    |                           | C2'3'H,ribose     | 4.38(m)      | 86.6      |
| 33 | UDP-Glucuronate           | C4'H,ribose       | 4.29(m)      | 86.1      |
|    |                           | C5'H,ribose       | 4.25/4.19    | 67.8      |
|    |                           | G5-H              | 4.14(dd)     | 75.6      |
|    |                           | G2-H              | 3.79(dd)     | b         |
|    |                           | G4-H              | 3.59(m)      | 63.2      |
|    |                           | G3-H              | 3.51(dd)     | 72.7      |
|    |                           | C2'3'H,ribose     | 4.37(m)      | 76.6      |
|    |                           | C4'H,ribose       | 4.29(m)      | 85.9      |
|    |                           | C5'H,ribose       | 4.25/4.19(m) | 67.8      |
|    |                           | C1'H,ribose       | 5.99(d)      | 91.1      |
|    |                           | C5,ring           | 5.97(d)      | 105.4     |
|    |                           | C6,ring           | 7.96(d)      | 144.1     |
| 34 | UDP-N-acetylgalactosamine | NA-H              | 2.09(s)      | 24.9      |
|    |                           | NA-C=O            | b            | b         |
|    |                           | G1-H              | 5.56(dd)     | 97.5      |
|    |                           | G2-H              | 4.05(m)      | 71.2      |
|    |                           | G3-H              | 3.97(dd)     | 70.3      |
|    |                           | G4-H              | 3.76(m)      | 57.4      |
|    |                           | G5-H              | 3.79         | 63.6      |
|    |                           | G6-H              | 3.78         | 63.6      |

|    |                         |                   |              |           |
|----|-------------------------|-------------------|--------------|-----------|
|    |                         | C6,ring           | 7.96(d)      | 144.1     |
|    |                         | C1'H,ribose       | 5.99(d)      | 91.0      |
|    |                         | C5,ring           | 5.97(d)      | 105.4     |
|    |                         | C2'3'H,ribose     | 4.37(m)      | 72.2/76.5 |
|    |                         | C4'H,ribose       | 4.29(m)      | 86.0      |
|    |                         | C5'H,ribose       | 4.25/4.19(m) | 67.8      |
| 35 | UDP-N-acetylglucosamine | C2,ring           | b            | 156.6     |
|    |                         | G1-H              | 5.52(dd)     | 97.4      |
|    |                         | G2-H              | 3.99(m)      | 56.5      |
|    |                         | G3-H              | 3.82(m)      | 73.6      |
|    |                         | G4-H              | 3.55(dd)     | 72.2      |
|    |                         | G5-H              | 3.93         | 75.8      |
|    |                         | G6-H              | 3.87         | 63.2      |
|    |                         | NA-H              | 2.08(s)      | 24.9      |
|    |                         | NA-C=O            | b            | 177.4     |
|    |                         | CH <sub>2</sub>   | 3.80(dd)     | b         |
|    |                         | CH <sub>2</sub> ' | 3.91(dd)     | b         |
| 36 | Uridine                 | C(5)H of ribose   | 4.14(m)      | b         |
|    |                         | C(4)H of ribose   | 4.24(dd)     | b         |
|    |                         | C(3)H of ribose   | 4.36(dd)     | b         |
|    |                         | C(2)H of ribose   | 5.92(d; 8.1) | b         |
|    |                         | C-CH of uracil    | 5.91(d; 4.7) | b         |
|    |                         | N-CH of uracil    | 7.89(d; 8.1) | 145.6     |
|    |                         | γCH <sub>3</sub>  | 1.00(d; 7.0) | 19.4      |
|    |                         | γ'CH <sub>3</sub> | 1.04(d; 7.0) | 20.7      |
| 37 | Valine (Val)            | βCH               | 2.28(m)      | 31.5      |
|    |                         | αCH               | 3.62(d; 4.3) | 63.0      |
|    |                         | COOH              | b            | 177.4     |

<sup>#</sup> The assignment was accomplished with the assistance of a series of two dimensional NMR spectra including <sup>1</sup>H-<sup>1</sup>H COSY, <sup>1</sup>H-<sup>1</sup>H TOCSY, <sup>1</sup>H J-resolved, <sup>1</sup>H-<sup>13</sup>C HSQC and <sup>1</sup>H-<sup>13</sup>C HMBC; Small signals were confirmed by standard compounds as well;

<sup>a</sup> Multiplicity: singlet(s), doublet(d), triplet(t), quartet(q), doublet of doublets(dd), doublet of triplets (dt), multiplet(m);

<sup>b</sup> The signals or the multiplicities were not determined.
